# Supplementary material
Source: PubMed Central journal article supplement (PMC7876780)
Supplement: NIHMS1627629-supplement-Appendix_1.pdf [file NIHMS1627629-supplement-Appendix_1.pdf]

**Appendix 1:** list of the excluded studies after full test screening, with reasons for exclusion.

| <b>TITLE</b>                                                                                                                                                                               | <b>First author<br/>Year of publication</b> | <b>Reasons for exclusion</b>                        |
|--------------------------------------------------------------------------------------------------------------------------------------------------------------------------------------------|---------------------------------------------|-----------------------------------------------------|
| Colour Doppler analysis of ophthalmic vessels in the diagnosis of carotid artery and retinal vein occlusion, diabetic retinopathy and glaucoma: systematic review of test accuracy studies | Bittner 2016                                | No OCT test                                         |
| Do findings on routine examination identify patients at risk for primary open-angle glaucoma? The rational clinical examination systematic review                                          | Hollands 2013                               | No OCT test                                         |
| Confocal scan laser ophthalmoscope for diagnosing glaucoma: a systematic review and meta-analysis                                                                                          | Yaghoubi 2015                               | No OCT test                                         |
| Macular versus Retinal Nerve Fiber Layer Parameters for Diagnosing Manifest Glaucoma: A Systematic Review of Diagnostic Accuracy Studies                                                   | Oddone 2016                                 | Direct comparison between parameter                 |
| Accuracy of pupil assessment for the detection of glaucoma: a systematic review and meta-analysis                                                                                          | Chang 2013                                  | No OCT test                                         |
| Screening tests for detecting open-angle glaucoma: systematic review and meta-analysis                                                                                                     | Mowatt 2008                                 | Screening study                                     |
| Meta-analysis of stratus OCT glaucoma diagnostic accuracy                                                                                                                                  | Chen 2014                                   | Time Domain OCT                                     |
| Validity and cost-effectiveness of methods for screening of primary open angle glaucoma                                                                                                    | Antony 2007                                 | Method review                                       |
| Automated perimetry: a report by the American Academy of Ophthalmology                                                                                                                     | Delgado 2002                                | No OCT test                                         |
| The evidence base to select a method for assessing glaucomatous visual field progression                                                                                                   | Ernest 2012                                 | Review of methods for assessing disease progression |
| Methodology and reporting of diagnostic accuracy studies of automated perimetry in glaucoma: evaluation using a standardised approach                                                      | Fidalgo 2015                                | No OCT test                                         |
| Open-angle glaucoma: diagnosis, follow up and treatment. A systematic literature review from SBU                                                                                           | Heijl 2010                                  | Narrative Review                                    |
| Systematic Review of Current Devices for 24-h Intraocular Pressure Monitoring                                                                                                              | Ittoop 2016                                 | No OCT test                                         |
| Rebound tonometry in children: a report by the American Academy of Ophthalmology                                                                                                           | Lambert 2013                                | No OCT test                                         |
| Alteration of fractional anisotropy and mean diffusivity in glaucoma: novel results of a meta-analysis of diffusion tensor imaging studies                                                 | Li 2014                                     | No OCT test                                         |
| Optic nerve head and retinal nerve fiber layer analysis: a report by the American Academy of Ophthalmology                                                                                 | Lin 2007                                    | Narrative Review                                    |
| Diagnostic value of OCT for primary glaucoma: a meta analysis                                                                                                                              | Liu 2014                                    | OCT model                                           |
| Meta-analysis of the diagnostic efficiency of frequency-doubling technology for primary glaucoma                                                                                           | Liu 2007                                    | No OCT test                                         |
| Meta-analysis of diagnostic capability of frequency-doubling technology (FDT) for primary glaucoma                                                                                         | Liu 2006                                    | No OCT test                                         |

|                                                                                                                                                                |                   |                                        |
|----------------------------------------------------------------------------------------------------------------------------------------------------------------|-------------------|----------------------------------------|
| Advanced Morphological and Functional Magnetic Resonance Techniques in Glaucoma                                                                                | Mastropasqua 2015 | No OCT test                            |
| Diagnostic accuracy research in glaucoma is still incompletely reported: An application of Standards for Reporting of Diagnostic Accuracy Studies (STARD) 2015 | Michelessi 2017   | Method Review                          |
| Gaps in Glaucoma care: A systematic review of monoscopic disc photos to screen for glaucoma                                                                    | Newman-Casey 2014 | No OCT test                            |
| The quality of reporting of diagnostic accuracy studies in glaucoma using scanning laser polarimetry                                                           | Paranjothy 2007   | Method Review                          |
| The quality of reporting of diagnostic accuracy studies in glaucoma using the Heidelberg retina tomograph                                                      | Shunmugam 2006    | Method Review                          |
| STARD 2015 was reproducible in a large set of studies on glaucoma                                                                                              | Virgili 2017      | Method Review                          |
| Optical coherence angiography: A review                                                                                                                        | Wylegala 2016     | Narrative review of OCT angiography    |
| Retinal Nerve Fiber Layer Thickness Changes in the Pseudoexfoliation Syndrome: A Meta-Analysis of Case-Control Studies                                         | Yu 2018           | Secondary glaucoma as target condition |
